# 1 **Unlocking the functional potential of polyploid yeasts**

2 **Simone Mozzachiodi<sup>1,2</sup>, Kristoffer Krogerus<sup>3</sup>, Brian Gibson<sup>3,#</sup>, Alain Nicolas<sup>1,2,4</sup> and Gianni Liti<sup>1</sup>**

3

## 4 **Affiliations**

5 <sup>1</sup>Université Côte d'Azur, CNRS, INSERM, IRCAN, Nice, France.

6 <sup>2</sup>Meiogenix, 38, rue Servan, Paris 75011, France.

7 <sup>3</sup>VTT Technical Research Centre of Finland Ltd., Espoo, Finland.

8 <sup>4</sup>Institut Curie, Centre de Recherche, CNRS-UMR3244, PSL Research University, Paris 75005,  
9 France.

10

## 11 **Notes**

12 <sup>#</sup>Current address: Institute for Food Technology and Food Chemistry Department of Brewing and  
13 Beverage Technology, Technical University, 13353, Berlin, Germany

14

15 Correspondence and requests for materials should be addressed to:

16 S.M. ([simone.mozzachiodi@univ-cotedazur.fr](mailto:simone.mozzachiodi@univ-cotedazur.fr)) and G.L. ([gianni.liti@unice.fr](mailto:gianni.liti@unice.fr)).

## 17 **Abstract**

18 Breeding and domestication have generated widely exploited crops, animals and microbes. However, many  
19 *Saccharomyces cerevisiae* industrial strains have complex polyploid genomes and are sterile, preventing  
20 genetic improvement strategies based on breeding. Here, we present a novel strain improvement approach  
21 based on the budding yeasts' property to promote genetic recombination when meiosis is interrupted and cells  
22 return-to-mitotic-growth (RTG). We demonstrated that two unrelated sterile industrial strains with complex  
23 triploid and tetraploid genomes were RTG-competent and developed a visual screening for easy and high-  
24 throughput identification of recombined RTG clones based on colony phenotypes. Sequencing of the evolved  
25 clones revealed unprecedented levels of RTG-induced genome-wide recombination. We generated and  
26 extensively phenotyped a RTG library and identified clones with superior biotechnological traits. Thus, we  
27 propose the RTG-framework as a fully non-GMO workflow to rapidly improve industrial yeasts that can be  
28 easily brought to the market.

29

## 30 **Introduction**

31 Humans have selected and improved organisms for centuries, leaving profound hallmarks of domestication in  
32 their genomes and lifestyles<sup>1</sup>. Selective breeding, in which hybrids with improved performance are generated,  
33 was one of humanity's first biotechnology advances and it is still widely applied<sup>2</sup>. The advent of new genetic  
34 engineering techniques enabled to directly manipulate core biological traits relevant for human activities<sup>3</sup>.  
35 However, the exploitation of genetically modified organisms (GMOs) in the food sector remains  
36 controversial, highly regulated and restricted in many countries.

37 Humans unwittingly domesticated yeasts of the genus *Saccharomyces* since the earliest food and beverages  
38 fermentations were carried out<sup>4-6</sup>. Since then, novel fermentation processes selected new yeast strains that are  
39 still used nowadays<sup>7</sup>. Nevertheless, there is a pressing interest across different sectors that exploit  
40 *Saccharomyces* yeasts to create new strain variants able to better tolerate stresses encountered during the  
41 industrial fermentations or increase the yield of desired compounds. Newly designed *de novo* lab-hybrids that  
42 combine different *Saccharomyces* species have displayed good or superior fermenting properties compared to  
43 common commercial strains suggesting that indeed commercial strains are not yet optimized, leaving room for  
44 improvement despite the long domestication period<sup>8-10</sup>. However, attempts to cross industrial yeasts through  
45 selective breeding or induce genomic recombination through meiosis are often unsuccessful due to the  
46 inherent sterility of the strains, which is a hallmark of yeast domestication<sup>6,11</sup>. This domestication-syndrome  
47 might have derived from the lack of selection on sexual reproduction, random genetic drift or adaptation to  
48 specific fermentation niches, leading to the accumulation of punctuated deleterious loss-of-functions (LOF)  
49 alleles that inactivate genes involved in the gametogenesis (sporulation in yeast). In addition, the genomes of  
50 industrial strains often have features such as extreme sequence divergence between the subgenomes (namely

51 heterozygosity), structural rearrangements, aneuploidy and polyploidy all of which are known to contribute to  
52 sterility<sup>12</sup>. Classic examples are strains used in beer production or in the baking industry sharing different  
53 ancestries that have repeatedly converged toward polyploid complex genomes<sup>5,13,14</sup>. However, tetraploid  
54 strains derived from designed crosses perform a correct chromosome segregation and produce viable  
55 gametes<sup>15</sup> in contrast to triploid strains. Therefore, the genetic basis driving this extreme sterility are not yet  
56 fully understood and multiple factors likely contribute to impair the sexual reproduction of industrial  
57 polyploid strains. Thus, other approaches to improve sterile industrial strains have been proposed<sup>16</sup> because  
58 directly fixing the lack of a complete sexual reproduction remains unfeasible.

59 Recently, we demonstrated that aborting meiosis in laboratory-derived sterile diploid hybrids and returning  
60 them to mitotic growth, a process called return-to-growth (RTG), generated genetic diversity and resulted in  
61 phenotypic variability in the evolved samples<sup>17,18</sup>. RTG is induced when cells that have entered meiosis but  
62 are not yet committed to complete it are shifted back to a nutrient-rich environment<sup>19</sup>. As in normal meiosis,  
63 after DNA replication Spo11p induces multiple genome-wide double-stranded breaks (DSBs) that lead to the  
64 formation of intermediate recombinant molecules<sup>20</sup>. These molecules are then resolved upon the resumption of  
65 the mitotic cycle, resulting in dispersed LOH tracts that derive from the segregation of the chromatids in the  
66 mother and the daughter cells. Despite generating multiple dispersed LOH tracts, the RTG process is not  
67 mutagenic and it preserves the initial genome content in diploid laboratory strains<sup>17</sup>. Furthermore, the LOHs  
68 induced by RTG can lead to rapid phenotypic diversification through the unmasking of beneficial alleles<sup>17,18</sup>.  
69 Given that RTG induces phenotypic variation without complete sexual reproduction, which often is defective  
70 in industrial strains, RTG may represent a powerful approach for improvement of industrial strains. However,  
71 it is still unknown whether the RTG paradigm can induce recombination and unlocks novel phenotypic  
72 variability without triggering systemic genomic instability in such complex genomic scenarios. Furthermore,  
73 the selection of RTG recombinant clone either requires genetically-engineered selective markers<sup>17</sup> or a lengthy  
74 and low throughput microdissection approach<sup>18</sup>. This hinders the scaling-up of the RTG process to generate a  
75 large library of recombined industrial yeasts. Here, we developed a comprehensive workflow to improve  
76 polyploid industrial yeasts through RTG and easily select RTG-recombined clones. We applied this workflow  
77 to generate a non-GMO library of evolved industrial polyploid strains harbouring improved biotechnological  
78 traits.

79

## 80 **Results**

### 81 **Genomic and reproductive portraits of industrial polyploid yeasts**

82 Domesticated strains derived from wild yeast ancestors show hallmarks of genomic complexity such as  
83 polyploidy, aneuploidy and horizontal gene transfer (HGT) (**Fig. 1a**). In order to develop a tailored RTG  
84 framework for industrial strains (**Fig. 1b**), we selected two genetically unrelated industrial *S. cerevisiae* strains  
85 as test cases, hereafter called OS1364 and OS1431 (**Fig. 1a**), and characterise their genomes and reproductive  
86 capacity. OS1364 was isolated from a cassava factory in Brazil and belongs to the mosaic beer clade, whereas  
87 OS1431 was isolated from an ale beer fermentation in England and belongs to the ale beer clade<sup>13</sup>

88 **(Supplementary table 1)**. We performed both short- and long-reads sequencing and detected multiple  
89 hallmarks of domestication. Despite their genetic ancestry, both strains are polyploid, with OS1364 being  
90 triploid (3n, with one additional copy of chromosome III) and OS1431 being tetraploid (4n) **(Supplementary**  
91 **Figure 1a-b)**. Furthermore, both genomes harbour a considerable number of heterozygous positions (~40K)  
92 distributed genome-wide suggesting that these two strains are intraspecies hybrids generated by admixture of  
93 different *S. cerevisiae* strains **(Fig. 1c, Supplementary Figure 1c)**. A large region of loss-of-heterozygosity  
94 (LOH) is present on chromosome XII downstream of the rDNA locus in both strains **(Supplementary Figure**  
95 **1c)**, consistent with this locus being inherently prone to recombination<sup>5,13</sup>. We detected several single-  
96 nucleotide polymorphisms within coding regions ( $n=28932$  OS1364,  $n=32399$  OS1431) with OS1431  
97 harbouring more than the expected number (Expected ~75%, based on the reference genome, Observed 82.2%  
98 ). Among these polymorphisms we found pervasive heterozygous missense variants ( $n=10747$  OS1364,  
99  $n=13033$  OS1431, **Supplementary Figure 1d**). We observed that the genetic variation also manifests in the  
100 form of copy number variants (CNVs) **(Supplementary Figure 1b)**, resulting in small amplifications or  
101 deletions similar to those previously observed in industrial strains<sup>5</sup>. Subtelomeric regions are known to be  
102 highly enriched in this type of variation<sup>21</sup>. For instance, we detected a large horizontal gene transfer (HGT)  
103 region close to the subtelomere XIII-R of OS1364 (present in two homologs) **(Supplementary Figure 1e)**.  
104 HGT regions are known to harbour genes that improve fitness in the fermentation environment and have been  
105 detected often in domestic strains<sup>22</sup>. The genetic diversity observed in the two strains might reflect the  
106 different evolutionary histories of the haplotypes before or after the admixture.

107 Next, we investigated the reproductive capacity of these polyploid strains and observed a defective sexual  
108 reproduction **(Fig. 1d)**. Specifically, the strains showed slow, asynchronous and inefficient meiotic  
109 progression and generated nearly completely unviable gametes (less than 1%). The high heterozygosity and  
110 lack of an effective sexual reproduction suggest that the genetic load might contribute to gametes' unviability.  
111 By using Ensemble Variant Effect Predictor (VEP) **(Methods)**, we detected many highly deleterious variants  
112 in both genomes (start-loss, stop-loss, stop-gain,  $n=207$  OS1364,  $n=338$  OS1431), including 10 (OS1364) and  
113 24 (OS1431) in essential genes<sup>23</sup> **(Fig. 1e, Supplementary Tables 2 and 3)**. OS1364 has accumulated a  
114 number of deleterious variants not significantly different from the average number of LOFs observed in  
115 domesticated strains of the 1011 *S. cerevisiae* collection<sup>11</sup>, whereas OS1431 has accumulated significantly  
116 more LOFs **(Supplementary Figure 1f)**. Given OS1431 is tetraploid and tetraploid strains correctly segregate  
117 their chromosomes in contrast with triploid strains<sup>24</sup>, the observed genetic load is likely to drive part of its  
118 sterility. However, we performed a GO-term analysis to test if genes involved in the sporulation process had  
119 accumulated LOFs and we did not find any enrichment of LOF in sporulation associated genes in frame with  
120 the results that cells of both strains entered meiosis when starved. Overall, these two sterile domesticated *S.*  
121 *cerevisiae* strains with complex polyploid genomes represent ideal test cases to probe the RTG framework.

122

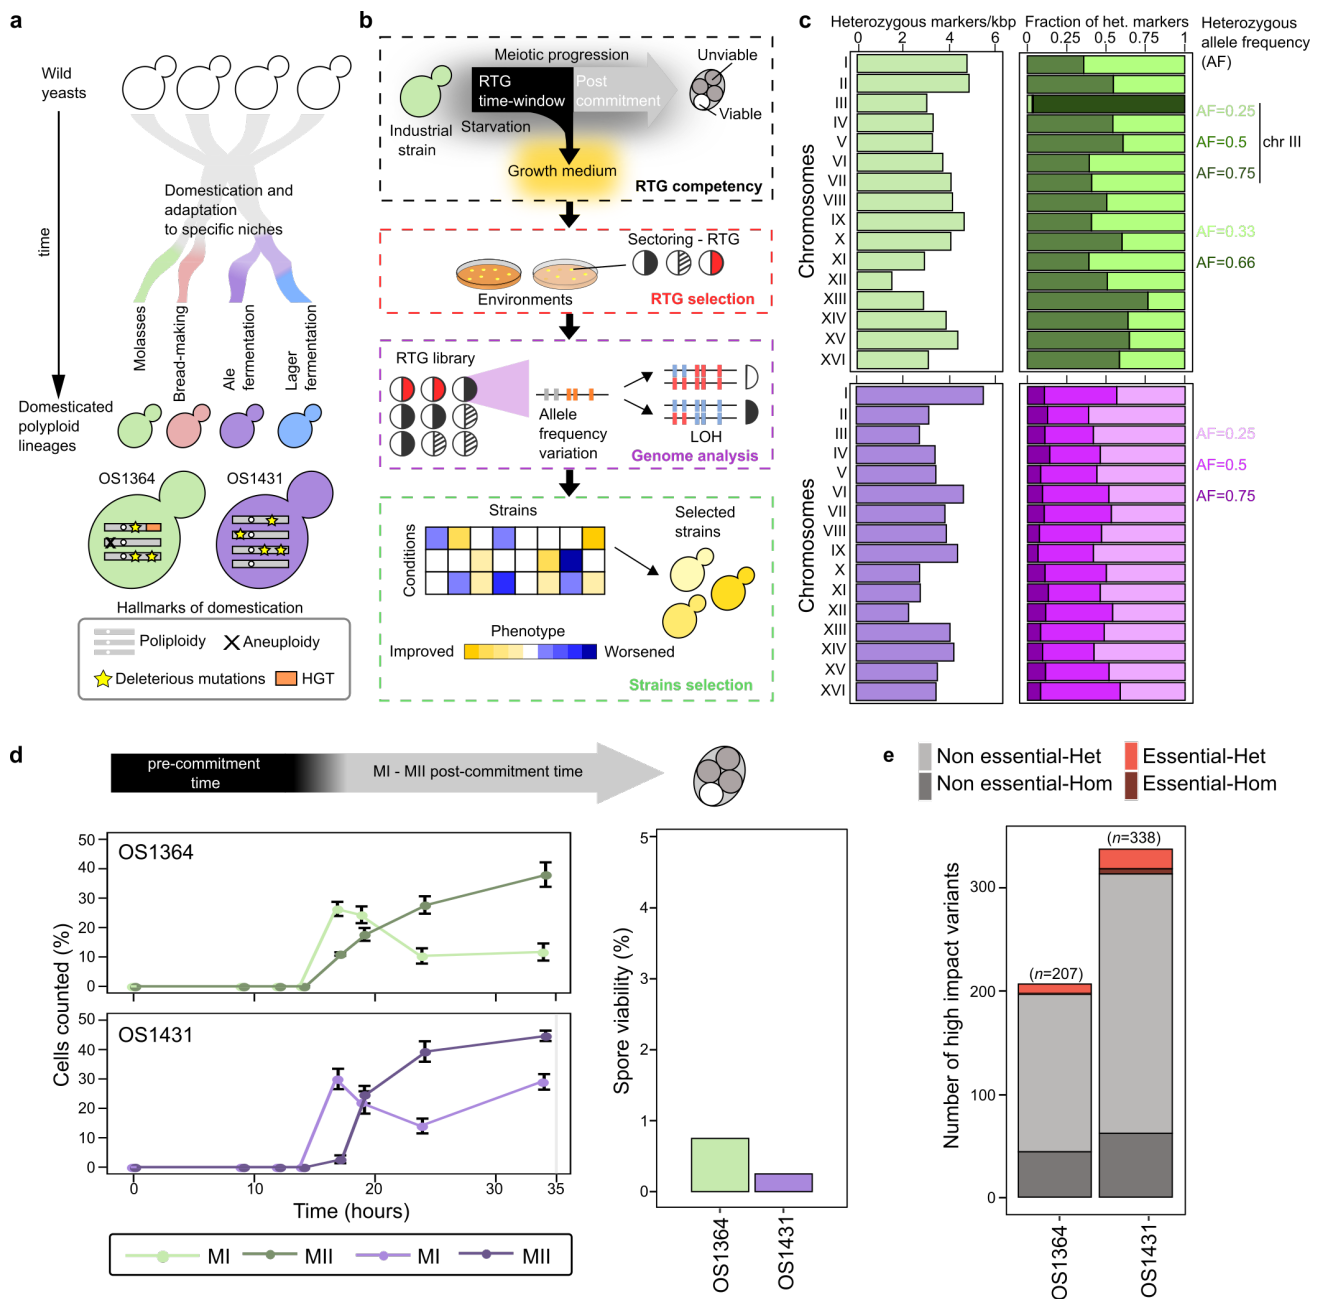

123

124

125

126

127

128

129

130

131

132

133

134

135

136

137

138

**Fig. 1. Genome complexity and sterility of domesticated *S. cerevisiae*** | (a) Domestication produced polyploid strains adapted to specific human-made niches that are characterised by common genomic hallmarks (bottom box), which are detected in both strains used in this study. (b) Schematic depicting the RTG framework: we initially quantify and optimise the meiotic progression, followed by selection of novel colony phenotypes. Finally, RTG samples are sequenced and phenotyped to identify clones with improved industrial traits. (c) Left: Level of heterozygosity (number of heterozygous markers/kbp) across each chromosome, total number of heterozygous markers ( $n=40431$  OS1364 (green),  $n=39376$  OS1431 (purple)). Right: Heterozygous markers partitioned according to their allele frequency. (d) Meiotic progression measured by nuclei DAPI staining, reported as the average ( $n=3$  replicates) of the percentage of cells that have progressed over the first (MI) and second (MII) meiotic division. The error bars represent the standard deviation. On the right, bar plot representing the spore viability (3 viable spores/400 OS1364, 1 viable spore/400 OS1431). The top arrow is a qualitative description of the meiotic progression based on the results of the DAPI staining. (e) The bar plot represents the number of high-impact variants affecting essential (red) or non-essential (grey) genes and further divided into homozygous (Hom) if present in all the haplotypes, and heterozygous (Het) if not present in all the haplotypes.

### 139 **Sterile polyploids are RTG competent**

140 Despite the fact these polyploid *S. cerevisiae* hybrids show an inefficient meiotic progression and generate  
141 inviable gametes, we conjectured that RTG should not be precluded since it only relies on the meiotic  
142 prophase progression, a time window in which cells are not yet committed to complete meiosis. To test if our  
143 two polyploid hybrids are able to perform RTG, we engineered them with a genetic system to measure LOH  
144 rates at a heteroallelic *LYS2/URA3* locus on chromosome II, that we have broadly applied in RTG  
145 experiments<sup>17,25</sup> (**Fig. 2a**). We validated the genotype of the engineered *LYS2/URA3* strains by PCR and  
146 growth on selective media (**Supplementary Figure 2a, Supplementary Table 4**). Then, we evolved the  
147 engineered OS1364<sup>*LYS2/URA3*</sup> and OS1431<sup>*LYS2/URA3*</sup> through RTG and collected cell populations throughout the  
148 meiotic progression (**Fig. 2b**). We calculated the RTG-induced recombination by comparing the basal level of  
149 cells growing on 5-FOA measured in the unsporulated cultures (T0) to the RTG cells obtained after 6 hours  
150 (T6) and 14 hours (T14) of sporulation induction (**Methods**). We detected a 10-fold and 3-fold increase of  
151 cells growing on 5-FOA, indicating an increased LOH rate at T14 in OS1364<sup>*LYS2/URA3*</sup> and in OS1431<sup>*LYS2/URA3*</sup>  
152 respectively, whereas the increase was not significant at T6, consistent with the fact that cells have not  
153 progressed sufficiently through meiosis at this timepoint (**Fig. 2b, Supplementary Table 5**). The absolute  
154 percentage of cells grown at T14, calculated subtracting the T0 background value to the T14 (**Methods**), was  
155 almost 2-fold higher in OS1431<sup>*LYS2/URA3*</sup> (0.10 % in OS1364<sup>*LYS2/URA3*</sup>, 0.19 % OS1431<sup>*LYS2/URA3*</sup>), in line with its  
156 lower heterozygosity on chromosome II (**Fig. 1c**) where pre-existing small LOH regions might represent  
157 preferential sites of recombination<sup>25</sup>. To further prove that RTG induced the increase in recombination  
158 observed at the *LYS2/URA3* locus we deleted all three copies of *SPO11*, which is essential for inducing DSBs  
159 in meiosis, in OS1364<sup>*LYS2/URA3*</sup> (**Supplementary Figure 2b**) and measured recombination. We did not detect  
160 any significant increase between the T0 and the respective T14 in the OS1364<sup>*LYS2/URA3*</sup> *spo11Δ* strain  
161 (**Supplementary Figure 2c, Supplementary Table 5**), supporting the conjecture that RTG caused the  
162 increased recombination as it relies on the Spo11p induced DSBs in early meiosis.

163 We next performed whole-genome sequencing of the *LYS2/URA3* parental strains, controls (T0) ( $n=2$   
164 OS1364,  $n=2$  OS1431, **Table S1**) and RTG-evolved clones (T14) ( $n=11$  OS1364,  $n=11$  OS1431, **Table S1**)  
165 isolated on 5-FOA plates to evaluate the genome-wide impact of RTG. Our analyses revealed varying levels  
166 of recombination in the RTG clones, consistent with previous reports in RTG diploid hybrids<sup>17,18</sup> (**Fig. 2c-d**,  
167 **Supplementary Figure 2d**). The RTG clones derived from OS1364<sup>*LYS2/URA3*</sup> had an average of 10% (maximal  
168 value 26%) of the genome affected by LOH, whereas OS1431<sup>*LYS2/URA3*</sup> had an average of 6.7% (maximal value  
169 13.5%). Moreover, we did not detect any chromosome loss potentially accounting for 5-FOA resistance in the  
170 RTG sequenced clones, showing that despite the strain polyploidy, LOH at the *LYS2/URA3* locus arose more  
171 frequently than aneuploidy during RTG. We observed overall genome-wide stability and detected only one  
172 aneuploidy and two large CNVs across the 11 RTGs derived from OS1431<sup>*LYS2/URA3*</sup>, where the two CNVs  
173 likely resulted from ectopic recombination initiated by a small region of homology between chromosome IX  
174 and chromosome XIV (**Supplementary Figure 3a-b-c**). Similarly, we detected only two aneuploidies in one  
175 RTG sample across the 11 samples derived from OS1364<sup>*LYS2/URA3*</sup>. Altogether, these results demonstrate that

176 these polyploid hybrids are RTG-competent despite their meiotic sterility, supporting that the RTG workflow  
 177 can generate genetic diversity in sterile industrial strains.

178

179

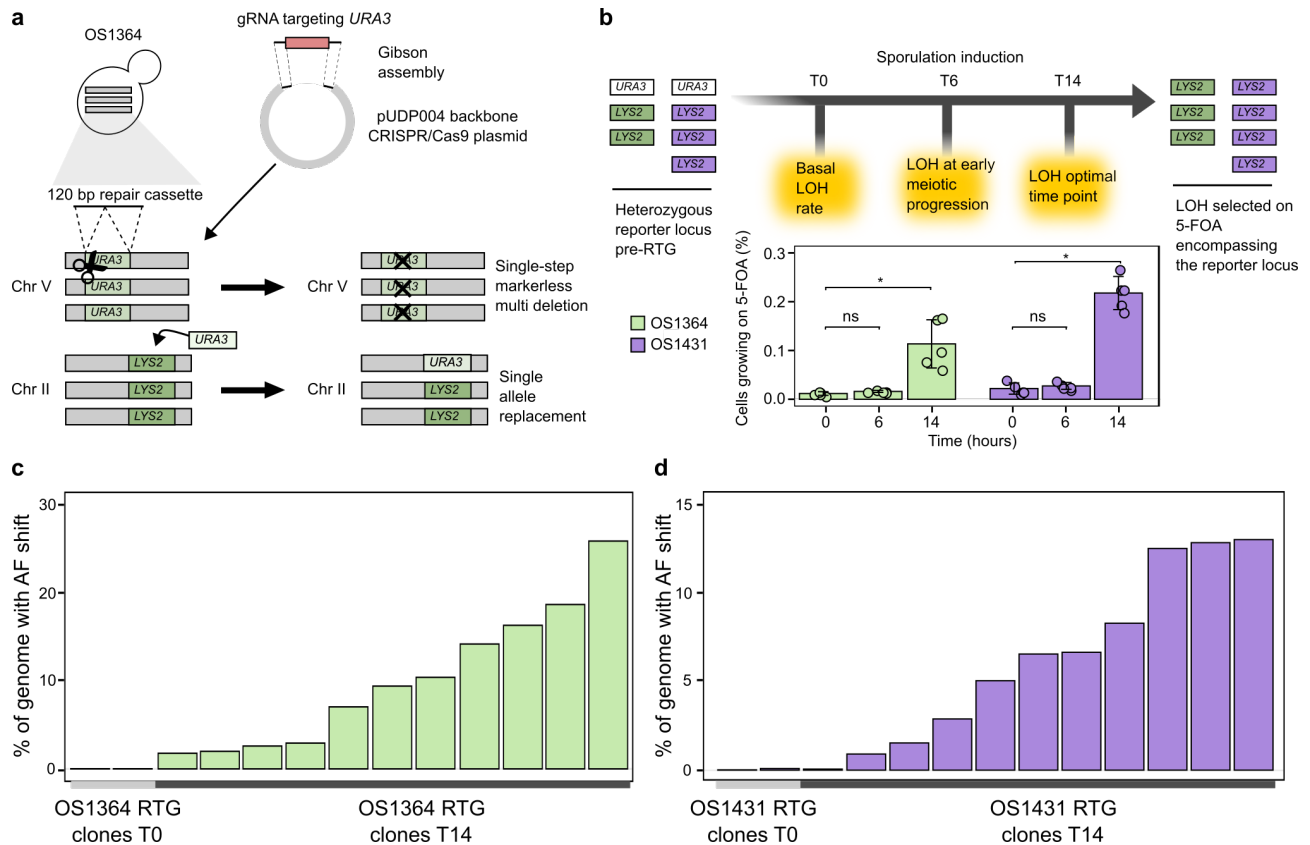

180

181

182 **Fig. 2. RTG induced recombination in polyploid sterile hybrids** | (a) A CRISPR-based approach enabled the  
 183 engineering of the *URA3*-loss genetic system in the polyploid strains. The strains generated in such way are hereafter  
 184 referred to as *LYS2/URA3* regardless of the number of loci. (b) Reporter assay used to measure recombination rate at the  
 185 heterozygotic locus *LYS2/URA3* (top panel). Bar-plots representing the average ( $n=5$  replicates) percentage of cells  
 186 growing on 5-FOA at different time points: no sporulation induction (T0), 6 hours (T6) and 14 hours (T14) of sporulation  
 187 induction (bottom panel). The increase of cells growing on 5-FOA at T14 compared to T0 was significant for both  
 188 samples ( $p$ -value  $< 0.05$ , one-sided Wilcoxon ranked-sum test) whereas was not significant at T6 ( $p$ -value  $> 0.05$ ,  
 189 one-sided Wilcoxon ranked-sum test). The error-bars represent the standard deviation. (c-d) Bar plot representing the  
 190 percentage of genome in which we detected an allele frequency (AF) shift for the RTG samples derived from  
 191 OS1364<sup>*LYS2/URA3*</sup> (green, c) and OS1431<sup>*LYS2/URA3*</sup> (purple, d). Recombination and LOH induced upon genome engineering  
 192 with CRISPR/Cas9 at the native *URA3* locus was excluded.

193

194

### 195 Selection of recombined RTG clones by natural colony phenotypes

196 The RTG selection based on *URA3*-loss requires genome editing and produces GMOs that have marketing  
 197 constraints in the food industry. To overcome this limitation, we devised an alternative selection strategy  
 198 based on natural variability in colony phenotypes such as morphology and colour. Colony phenotypes are  
 199 complex traits, influenced by both genetic and environmental factors (Fig. 3a). We used a YPD-based  
 200 medium with varying concentrations of dextrose (0.5% and 1%), a major environmental regulator of colony

201 morphology<sup>26,27</sup>, to unveil novel phenotype of colonies derived from RTGs of OS1364 and OS1431 wild-type  
202 (WT) cells (**Fig. 3a, Methods**). Indeed, we found phenotypic variability in the RTG colonies but the divergent  
203 phenotype was often present in only a large sector (approximately half) of the colony. Therefore, we  
204 hypothesized that the sectored colonies were mother-daughter (M-D) RTG pairs that did not complete  
205 budding at the time of plating. Consistently, we found sectored and non-sectored colonies according to when  
206 cells were plated after the RTG induction (**Supplementary Figure 4a**). We observed three types of sectored  
207 colony phenotypes in the RTG plates of OS1364 (wrinkled-smooth, red-white and dark-white) (**Fig. 3b,**  
208 **Supplementary Figure 4, Supplementary Table 5**) with a summed total frequency of ~0.75 % and one type  
209 of sectored colony in the OS1431 RTGs (wrinkled-smooth) with a frequency of ~0.5 % across all  
210 environments tested (**Fig. 3b, Supplementary Table 5**). In contrast, we did not observe any of these  
211 phenotypes in control plates where cells were plated without inducing sporulation. Thus, this result was in line  
212 with our initial hypothesis that the sectored colonies were unveiled in the modified YPD plates upon budding  
213 of recombined mother-daughter (M-D) RTGs, whereas the non-sectored colonies displaying phenotype  
214 variation represent RTG cells in which the mother and daughter were separated by the first budding before the  
215 plating. An alternative explanation is that the sectored RTG colonies derived from residual sporulation and  
216 spore germination, although this is unlikely given the near to zero spore viability observed. To undoubtedly  
217 exclude this scenario, we deleted the *NDT80* gene by CRISPR/Cas9 multi-deletion in both hybrids, to  
218 generate mutants that are RTG competent<sup>17,20</sup> but arrest before the first meiotic division (MI) and therefore  
219 unable to complete sporulation (**Supplementary Figure 5a-b**). Then, we evolved the OS1364<sup>*ndt80Δ*</sup> and  
220 OS1431<sup>*ndt80Δ*</sup> mutants through the same RTG protocol used for the wild-type hybrids (**Supplementary Figure**  
221 **5b**) and detected sectored phenotypes similar to those seen in the WT hybrids, thus excluding the possibility  
222 that residual sporulation contributes to the formation of sectored colonies.

223 We sequenced multiple paired samples derived from sectored RTG colonies and non-sectored RTG colonies  
224 derived from RTG in the OS1364 and OS1431 wild-type and *ndt80Δ* strains and samples isolated from control  
225 plates (T0) (**Supplementary Table 1**). Whole-genome sequencing revealed recombination detected as allele  
226 frequency (AF) shifts across the unphased heterozygous markers in all the putative M-D RTG colonies with a  
227 sectored phenotype (**Fig. 3c-d, Supplementary Figure 5c-d**). The fraction of the genome in which we  
228 detected RTG-induced recombination was highly variable in both strains (9.7±8.2% in OS1364, 4.8±2.4% in  
229 OS1431 WT-RTG, average ± SD), mirroring the results obtained from the *URA3*-loss assay. Moreover, we  
230 provided two additional proofs that the sectored RTG colonies were genuine RTG M-D pairs. First, the AF  
231 shift for heterozygous markers was largely reciprocal in the wild-type and *ndt80Δ* sectored RTG pairs with the  
232 rest of the non-reciprocal events representing gene-conversion (**Fig. 3e, Supplementary Figure 6a-b-c,**  
233 **Supplementary Table 12**) as found in M-D RTG pairs of diploid lab strains. In addition, by comparing each  
234 pair-wise combination of RTG M-D pairs we also found that each pair is clearly differentiated from the others  
235 in term of recombination landscape (**Supplementary Figure 6d**).

236 Nevertheless, some of these regions of recombination were shared across RTG M-D pairs with the same  
237 sectored phenotype (**Supplementary Figure 7a**) supporting the scenario that the colony phenotypes observed



238 were driven by localised LOH. Second, we observed a complementary gain and loss of one chromosome in  
239 one M-D pair derived from OS1364 (**Supplementary Figure 7b**), which is compatible with chromosome  
240 missegregation between M-D during RTG. Thus, we concluded that the sectored RTG colonies were indeed  
241 M-D pairs and we exploited the recombination generated by RTG in OS1364 M-D RTGs to produce phased  
242 local haplotypes showing a potential application of RTG in polyploid yeasts (**Supplementary Figure 7c**).  
243 Overall, we showed that highly recombined RTG M-D pairs can be selected by exploiting natural colony  
244 phenotypic variation and we proved that these phenotypes arise as a result of RTG-induced recombination.  
245  
246

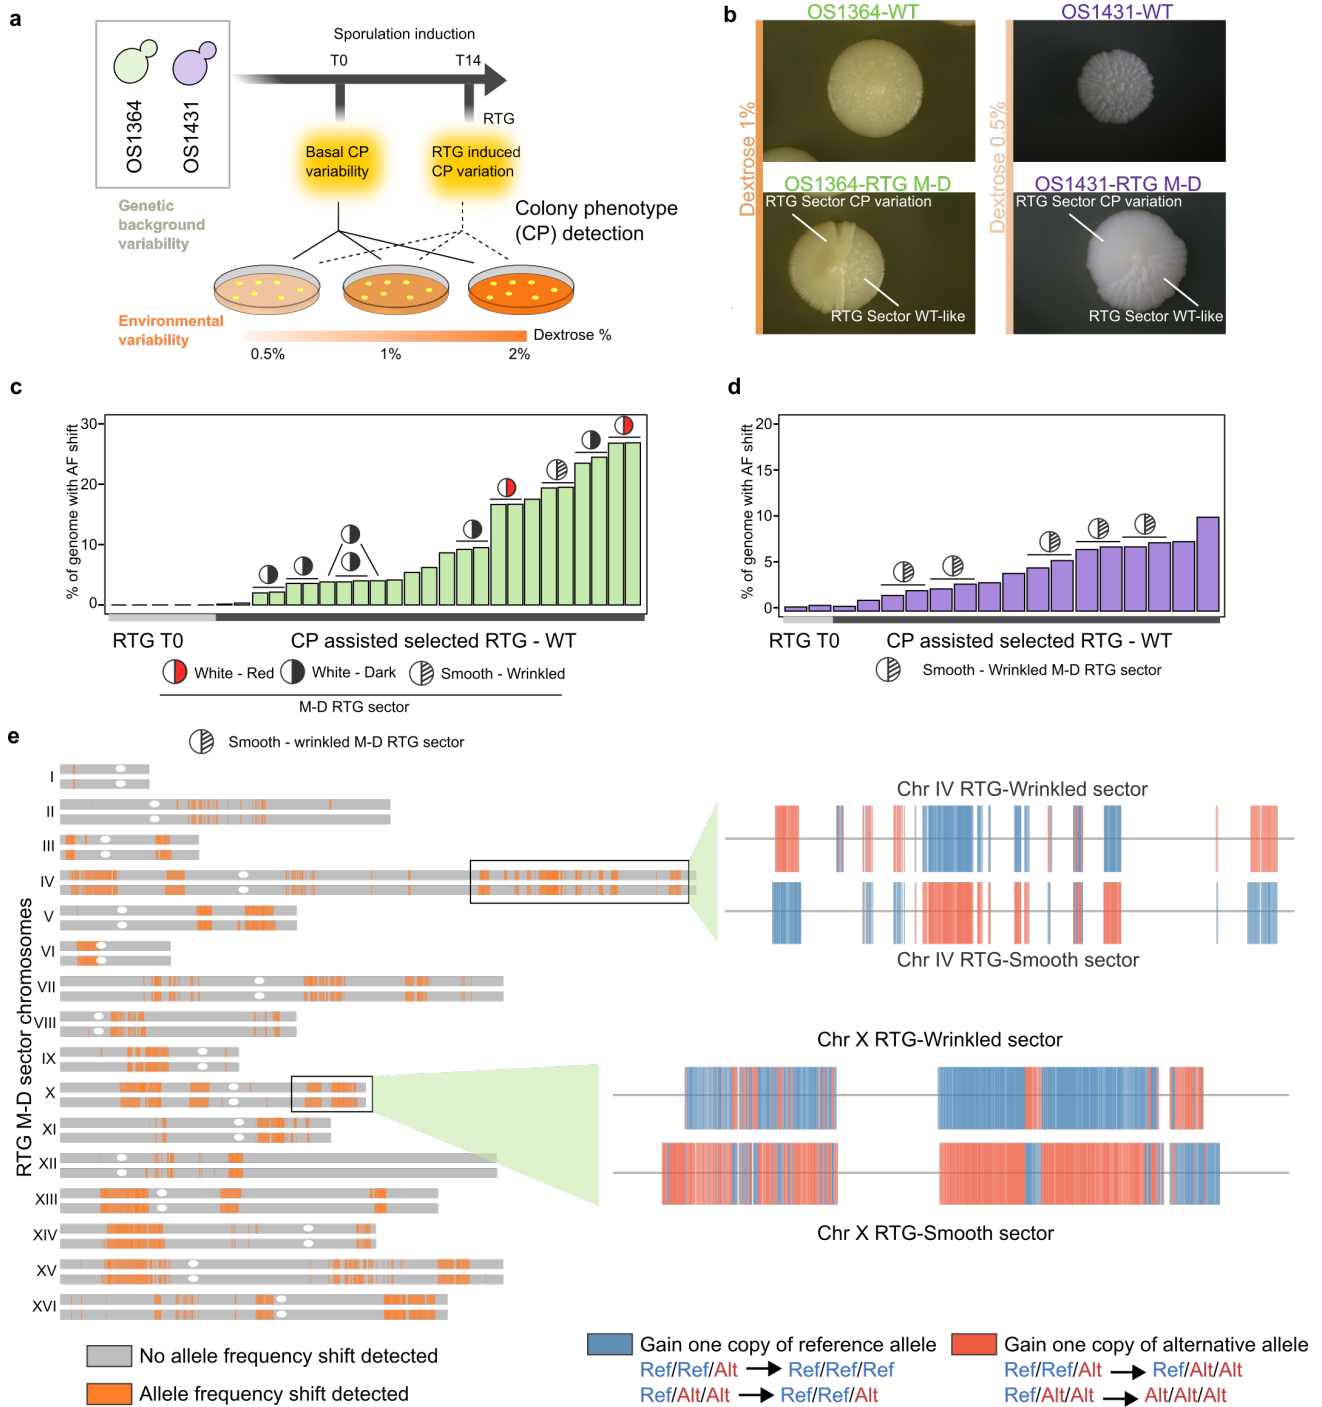

247

248

249

250

251

252

253

254

255

256

257

258

259

**Fig. 3. Colony phenotype variability revealed mother-daughter RTG pairs** | (a) Varying dextrose concentrations unveiled hidden colony phenotypic variation upon RTG. (b) Wild-type (WT) colony phenotypes (top) and sectored phenotypes emerging on RTG plates (bottom). The concentration of dextrose in the media is reported on the left. (c) The percentage of markers with allele frequency (AF) shift in the OS1364 derived RTG samples. The mother-daughter pairs for which both sectors were sequenced are indicated (circles). Single samples represent non-sectored RTG colonies ( $n=4$ ) or only one-side of a RTG sectored colony ( $n=3$ ). (d) As in panel c for the OS1431 background. (e) Recombination map of a RTG M-D pair (top chromosome: sm244/ bottom chromosome: sm245, derived from OS1364). Grey regions indicate the heterozygous markers without AF shifts, whereas orange regions contain heterozygous markers with AF shifts underlying LOH events. A zoom-in of two recombined regions is illustrated on the right. The colour code represents the genotype variation of the heterozygous markers so that the gain of a reference allele given the initial genotype is indicated in blue, whereas the gain of an alternative allele is indicated in red.

## 260 **RTG recombination improves industrial fitness**

261 Next, we probed the potential of RTG to improve industrial phenotypes. First, we compared the fermentation  
262 performances of OS1364 and OS1431 to the commercial strain WLP001 used as a reference to evaluate the  
263 fermentation performances of our strains (**Supplementary Table 1**). We confirmed that our two selected  
264 strains are competitive for industrial fermentation, with OS1364 outperforming both WLP001 and OS1431 for  
265 fast fermentation (**Supplementary Table 10**). However, both OS1364 and OS1431 had a substantial decline  
266 in cell viability (of ~25% and ~50% respectively) often observed in chronologically aged polyploid *S.*  
267 *cerevisiae*<sup>11</sup>, which is more modest in WLP001 (8%, **Supplementary Table 11**).

268 We started our phenotypic screening to identify potential improved RTG variants by evaluating selected non-  
269 GMO RTGs ( $n=25$  OS1364,  $n=16$  OS1431, **Supplementary Table 6**) and compared them to their respective  
270 parental strain and T0 controls ( $n=2$  OS1364,  $n=2$  OS1431) across several conditions mirroring industrial  
271 fermentations (**Fig. 4a**). We performed a first phenotypic screening in osmotic and alcoholic stress conditions  
272 and found that RTG samples had broad phenotypic variability with either a worsened, unchanged or improved  
273 phenotype as compared to the parental strains and the T0 controls (**Fig. 4b, Supplementary Table 6**). This  
274 scenario is consistent with the LOHs induced by RTG arising randomly in the genome and not as a by-product  
275 of a specific selective pressure. Moreover, some M-D RTG pairs showed complementary growth-rate  
276 variation (**Fig. 4c**) that can be explained by complementary LOHs segregating weaker and stronger alleles in  
277 the RTG pair. Growth rate variation in ethanol and maltose appeared to be moderately correlated in the  
278 OS1364 RTG library, underscoring that recombination might have affected pleiotropic genes regulating both  
279 traits (**Supplementary Figures 8a-b**).

280 Next, we selected RTG samples derived from OS1364 based on their phenotypic performance ( $n=12$ ) and  
281 their LOH landscape across a core set of fermentation genes ( $n=74$ ), and all the M-D RTG pairs from OS1431  
282 ( $n=10$ ) (**Supplementary Tables 7 and 8**). We inoculated the selected RTGs in a high-gravity wort (32°  
283 Plato), representing extreme fermentative conditions, to further investigate differences in stress resistance,  
284 carrying out a flask-scale fermentation for 13 days evaluating mass loss and ethanol produced at regular  
285 intervals (**Supplementary Table 9**). Some RTG samples showed increased fermentation kinetics (**Fig. 4d**) as  
286 well as a superior alcohol production (**Supplementary Figure 8c**) compared to the parental strains. We also  
287 noticed that in some M-D RTGs derived from OS1431 the fermentation performances were complementary  
288 (**Supplementary Figure 8d, Supplementary Table 9**). We hypothesized that RTG samples showing  
289 improved fermentation performances should also have improved resistance to fermentation stress and,  
290 potentially, higher post-fermentation cell viability. Therefore, we selected two RTG variants for each  
291 background among the best performers in the previous flask-scale fermentation, to carry on a 2-liter scale  
292 fermentation in high-gravity wort, to mimic modern industrial brewery practice (20° Plato). We found that  
293 OS1364 RTGs performed at least equally well as their respective parental strains, while OS1431 RTGs were  
294 slightly better in fermentation performances (**Supplementary Figure 9a, Supplementary Table 10**) but did  
295 not have increased post-fermentation viability (**Fig. 4e**). Remarkably, one OS1364 RTG had a large increase

296 in post-fermentation cell viability (**Fig. 4e, Supplementary Table 11**), reaching a level similar to WLP001,  
297 showing that RTG can fix detrimental traits.

298 Furthermore, we evaluated the aroma profile and the post-fermentation residual sugars, two parameters that  
299 are highly relevant in the beer industry. The two parental strains produced distinct aroma profiles from that of  
300 WLP001 and consumed almost all the sugars present in the wort (**Supplementary Table 11**). The four  
301 selected RTG samples did not show any deleterious trade-off in either phenotypes with the exception of a  
302 slight increase of acetaldehyde, in sm408, which is not desirable but the increase was negligible (Sensory  
303 threshold = 10 mg/mL, sm408 = 10.5 mg/mL, **Fig. 4f, Supplementary Table 11**). One RTG derived from  
304 OS1364 had a lower production of ethyl acetate (**Fig. 4f, Supplementary Figure 9c, Supplementary Table**  
305 **11**). This is consistent with recombination encompassing the gene *ATF2*, which has a role in shaping this trait  
306 (**Supplementary Table 8**). Moreover, the RTG derived from OS1364 showed diversified production of  
307 esters, which may lead to a further differentiation of the sensory profile of the beer (**Fig. 4f**).

308 Overall, our data demonstrate that RTG recombination in sterile polyploid strains can unlock phenotypic  
309 improvement in traits of industrial relevance<sup>16</sup>, contributing toward microbial stability or shaping the sensory  
310 quality of the product.

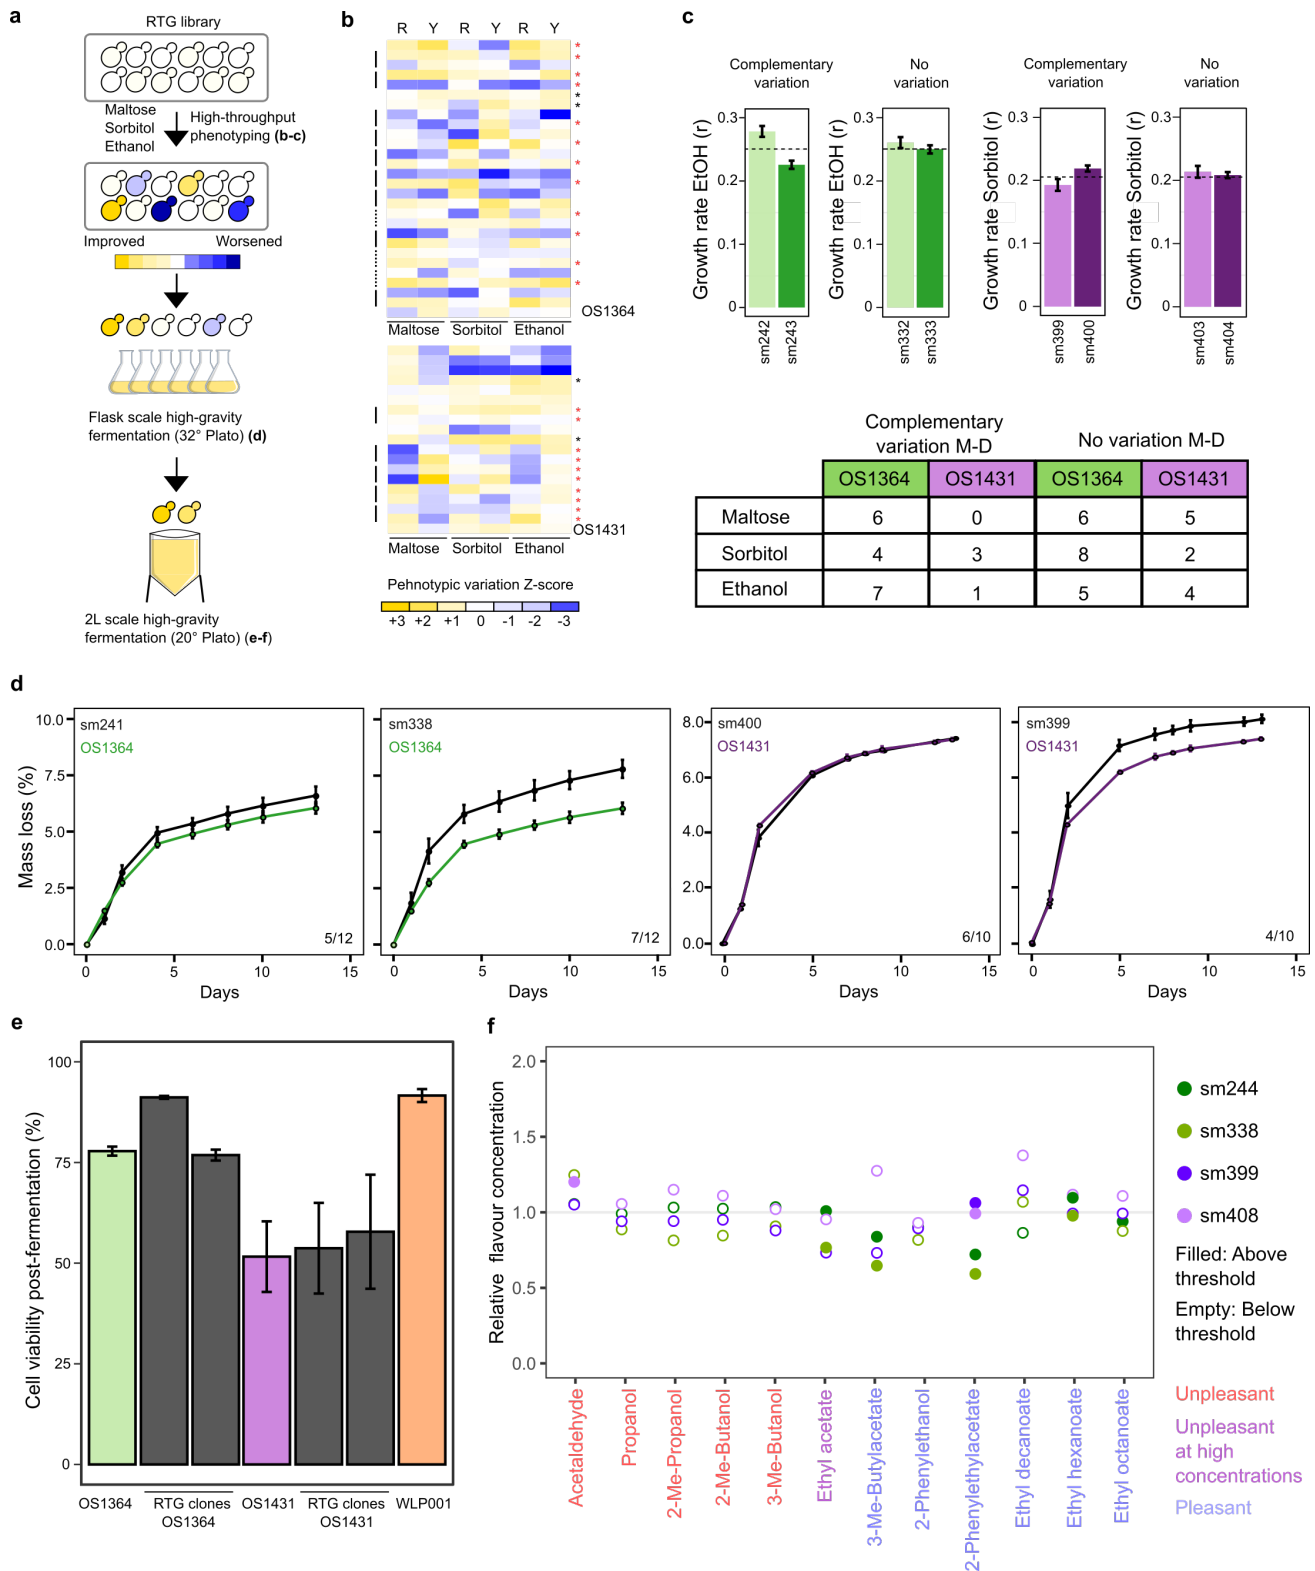

311

312

313 **Fig. 4. Phenotypic variability in industrial RTG variants** | (a) Schematic of the phenotypic screening performed.  
 314 Letters in parentheses indicate the respective data for the phenotypic screening depicted (b) Heatmaps representing  
 315 growth rate (1<sup>st</sup> column, R) and maximal optical density (2<sup>nd</sup> column, Y) of the RTG samples selected for the next  
 316 screening (red star), T0 samples (black star) and the M-D sectors (connected with lateral black line) and RTG-sectors for  
 317 which only one sample of the sector (dotted-black line). Each measure is the average of 4 technical replicates. (c)  
 318 Phenotypic diversification in sectored M-D pairs of OS1364 (green) and OS1431 (purple). Bar plots represent an  
 319 example of an RTG M-D pair with divergent phenotypic variation and absence of variation. A similar example is

320 reported on the left for OS1431. The dotted line represents the average phenotype in the RTG M-D library and the error  
321 bar represents the standard deviation. On the bottom table is reported the number of M-D pairs showing a complementary  
322 phenotypic variation per each class. **(d)** Mass loss curves during the flask scale fermentation experiment of an RTG  
323 without variation (left) and an improved RTG (right) for OS1364 (green) and OS1431 (purple), the error bars represent  
324 the standard deviation. The numbers on the bottom right represent the RTG samples in each category on the overall  
325 number of RTGs screened. **(e)** Post fermentation viability measured after a 2L-fermentation in high gravity wort for the  
326 two parents, the respective RTG samples and a commercial strain in triplicate. One RTG (sm244) derived from OS1364  
327 showed a huge increased in viability. The error bars represent the standard deviation. **(f)** Variability in the aroma profile  
328 across the four RTGs from the 2L scale fermentation, the values are expressed as relative change compared to the  
329 concentration produced by the parental strain.

330

331

## 332 **Discussion**

333 In this work, we showed that RTG is an efficient approach to generate genetic and phenotypic diversity in two  
334 fundamentally different industrial sterile yeast strains. Current approaches to improve industrial yeasts largely  
335 depend on designed targeted genetic modifications. Such approaches must contend with market restrictions  
336 and can garner societal mistrust<sup>16</sup>. As an alternative, we now show that RTG-assisted homologous  
337 recombination is an efficient approach to generate genetic and phenotypic diversity in polyploid and sterile  
338 industrial yeasts. The RTG approach, coupled with selection based on natural phenotypes generates non-GMO  
339 yeast strains that can be unrestrictedly introduced into the market. Compared to other non-GMO approaches  
340 such as serial transfer<sup>28,29</sup>, RTG induces a random genome shuffling as it does not select for a specific trait  
341 except for the genetic loci regulating the natural phenotype selected. Nevertheless, RTG has several benefits  
342 over the previous improvement strategies. We showed that the RTG process does not trigger genome  
343 instability in polyploid strains, similarly to diploid hybrids<sup>17,18</sup>. This is in contrast with direct selection where  
344 the abundant number of generations performed often results in ploidy and chromosome copy number  
345 variation<sup>30</sup>. Furthermore, trade-offs in unselected traits have been described as undesirable outcomes in  
346 adaptive evolution experiments<sup>31-33</sup>, although some solutions have been proposed to fix, for instance, the  
347 impaired sugar consumption emerging after adaptive evolution<sup>34</sup>. We also observed RTG variants with  
348 impaired performances. In fact, we found that the RTG M-D pairs often had complementary worsened and  
349 improved fitness in different environments. In addition, multiple deleterious trade-offs can accumulate in RTG  
350 samples when the fraction of the genome that recombines is large. However, the RTG library harbours  
351 samples with variable levels of genome-wide recombination and samples with a low level of recombination  
352 might be less likely to experience undesired trade-offs. Nevertheless, one of the most recombined RTG did  
353 not show phenotypic decay in the screenings performed; on the contrary, it was better able to tolerate the  
354 harsh fermentation conditions and had increased post-fermentative viability.

355 The RTG libraries are produced without introducing any selective pressure. Therefore, they are phenotypically  
356 agnostic, except for the trait used for the selection and can harbour improved phenotypes that are useful for  
357 multiple applications. The variability of “colony-associated-phenotypes” is a key parameter of the approach  
358 we devised for selecting M-D RTG recombinants, and it might be limited by the variability of natural  
359 phenotypes that can be screened upon RTG induction. However, a simultaneous screening of several  
360 environments could provide an effective solution to unveil variability in colony phenotypes. For instance,

361 there are media which can trigger a colour variation linked to relevant industrial traits, such as the production  
362 of hydrogen sulfide detected in BiGGY agar plates<sup>35</sup>. Moreover, our approach successfully captured mother  
363 and daughter RTG pairs that have only been isolated so far with a micromanipulation approach<sup>18</sup> developed  
364 for laboratory strains that cannot be scaled-up. We envision that our selection method can be easily automated  
365 to quickly screen hundreds of colonies<sup>36</sup>. In addition, our selection protocol can be easily performed and  
366 seamlessly integrated with other RTG methods that do not feature mother-daughter RTG pairs<sup>37</sup> or other yeast  
367 improvement strategies. For instance, strains derived from an adaptive evolution experiment could be further  
368 improved through RTG to erase trade-offs, or, vice-versa, RTG samples could be submitted to adaptive  
369 evolution to be further optimized. In addition, the RTG framework can be easily generalized to reshuffle  
370 designed hybrid genomes<sup>17,18</sup> as the only requirement is that the hybrid can enter meiosis and progress until  
371 the first meiotic prophase, even if with a low efficiency. The RTG approach has other practical applications as  
372 RTG libraries can be used in large-scale linkage analyses to unravel the genetic architecture of complex  
373 industrial traits and the RTG induced recombination could aid existing genome phasing methods<sup>38</sup> in  
374 producing polyploid *de-novo* genome-assemblies. In conclusion, we propose the RTG framework as a novel  
375 avenue to induce genetic and phenotypic variability in industrial sterile yeasts. RTG can generate variants that  
376 can easily reach the market and can also serve as a method to help our understanding of complex genetic traits  
377 in industrial strains.

378

## 379 **Methods**

### 380 **Detection of deleterious, missense mutations and pre-existing LOHs**

381 Short reads of the parental strains were obtained from the 1011 *S. cerevisiae* yeast project<sup>13</sup> and mapped  
382 against the SGD reference R64.2.1 using bwa-mem algorithm. Single nucleotide variants were called by using  
383 Freebayes (v1.3.1-19) with the argument “-p” to set an appropriate ploidy and quality >20. We annotated  
384 impactful mutations by using the Variant Effect Predictor (VEP) suite<sup>39</sup>. Mutations were annotated as  
385 impactful if they caused a stop-loss, stop-gain or start-loss. Subtelomeric variants or frameshift ones were  
386 included in the list to make the data comparable to the table of LOFs generated for the 1011 *S. cerevisiae*  
387 yeast project<sup>13</sup>. The list of essential genes was obtained from Liu et al<sup>23</sup>. The GO-term analysis was performed  
388 using the SGD GO-term analysis suite at <https://www.yeastgenome.org/> with a *p*-value threshold of 0.01 and  
389 selecting GO term associated with sporulation. We identified pre-existing LOHs in the genome of the parental  
390 strains by searching for non-overlapping regions of 50 kbp where we identified 10 or less heterozygous  
391 markers that were not shared by all the unphased haplotypes. The plots were generated using ggplot2 and in-  
392 house R scripts.

393

### 394 **Genome content analysis**

395 The genome content of OS1364 and OS1431 was measured using propidium iodide staining as described in  
396 Mozzachiodi et al<sup>17</sup> and compared to a reference diploid strain. Each strain was patched from a -80°C glycerol  
397 stock onto a YPD plate (1% yeast extract, 2% peptone, 2% dextrose, 2% agar) and incubated overnight at 30

398 °C. The following days the strains were incubated in 1 mL liquid YPD medium (1% yeast extract, 2%  
399 peptone, 2% dextrose) and growth overnight at 30 °C without shaking. The next day 200 µL of the overnight  
400 culture was resuspended in 1 mL of fresh YPD and growth until exponential phase. Then cells were  
401 centrifugated, washed with 1 mL water and fixed overnight in 1 mL of EtOH 70%. The following day each  
402 sample was washed with PBS 1X, resuspended in the PI staining solution (15 µM PI, 100 µg/mL RNase A,  
403 0.1% v/v Triton-X, in PBS) and incubated for 3 hours at 37 °C in the dark. Ten thousand cells for each sample  
404 were analysed on a FACS-Calibur flow cytometer. Cells were excited at 488 nm and fluorescence was  
405 collected with a FL2-A filter. An increase of 50% of the fluorescence value (a.u.) compared to the  
406 fluorescence signal of the diploid cells in G1 was used to assign a ploidy of 3n. An increase of 100% of the  
407 fluorescence value (a.u.) compared to the fluorescence signal of the diploid cells was used to assign a ploidy  
408 of 4n.

409

#### 410 **Long read sequencing and HGT identification**

411 Yeast cells were grown overnight in liquid YPD medium. Genomic DNA was extracted using Qiagen  
412 Genomic-Tips 100/G according to the manufacturer's instructions. The MINION sequencing library was  
413 prepared using the SQK-LSK108 sequencing kit according to the manufacturer's protocol. The library was  
414 loaded onto a FLO-MIN106 flow cell and sequencing was run for 72 hours. We performed long read  
415 basecalling and scaffolding using the pipeline LRSDAY<sup>40</sup>. The Canu assembler mostly merged the different  
416 haplotypes and thus prevented to produce long-read phased genomes. The dotplots were generated by using  
417 mummerplot<sup>41</sup>. The annotated non-reference regions on chromosome XIII of OS1364 were extracted from the  
418 fasta file of the collapsed assembly genomes (the haplotypes were not phased) and blasted by using the  
419 application “blastn” at <https://www.ncbi.nlm.nih.gov/> against the database of ascomycetes.

420

#### 421 **Sporulation monitoring and spore viability**

422 Yeast strains were patched on YPD plates and incubated at 30 °C for 24 hours. From the patch a streak for  
423 single was done and incubated at 30 °C for 48 hours, then single colonies were isolated and grown overnight  
424 at 30 °C in 10 mL of liquid YPD in a shaking incubator at 220 rpm. The following day, single colonies were  
425 inoculated in different tubes containing 10 mL of the pre-sporulation medium SPS (1% peptone, 1 %  
426 potassium acetate, 0.5% yeast extract, 0.17% yeast nitrogen base, 0.5% ammonium sulfate, 1.02% potassium  
427 biphthalate) and kept at 30°C in a shaking incubator for 24 hours. Tubes were then centrifuged and washed  
428 three times with sterile water and cells were resuspended in erlenmeyer flasks containing 25 mL of KAc 2%  
429 to reach a final OD of 1, and incubated at 23°C in a shaking incubator. Sporulation was monitored by DAPI  
430 staining of the sporulation cultures to detect cells which have passed the first meiotic division, and contain  
431 two nuclei, or the second meiotic division, and contain four nuclei. The cells were first washed with water and  
432 then fixed with EtOH 70 % overnight. Following, the cells were stained with DAPI and 10 µL of stained cells  
433 were spread on a microscope slide and incubated in the dark for 40 minutes. To infer the efficiency of meiotic  
434 progression the cells were analysed by fluorescence microscopy and scored as having one, two or four nuclei,



435 which indicates if they have not progressed after MI (one nucleus) or have progressed after MI (two nuclei) or  
436 MII (four nuclei). For assessing the spore viability, the spores were collected from the sporulated cultures and  
437 incubated between 30-60 minutes in 100  $\mu$ L of zymolase solution in order to perform spore dissection. At  
438 least 400 spores per sample were dissected on YPD plates. Spore viability was assessed as the number of  
439 spores forming visible colonies after 4 days of incubation at 30 °C.

440

#### 441 **Plasmid engineering and genome editing with CRISPR/Cas9**

442 The multi-deletions of *URA3*, *NDT80* and *SPO11* were engineered by using CRISPR/Cas9 genome editing.  
443 The plasmid harbouring Cas9 was obtained from Addgene pUDP004<sup>42</sup> and linearized with BsaI. The  
444 resistance to acetamide was replaced with the resistance cassette to Kanamycin. The gRNA with the necessary  
445 nucleotide for self-cleavage was designed on UGENE<sup>43</sup> and ordered as a synthetic oligo from Eurofins  
446 Genomics (™). The synthetic oligo was cloned into the plasmid backbone by using the Gibson assembly kit  
447 (NEB, Gibson Assembly®) and the ligation reaction was carried out for 1 hour at 50 °C. The assembled  
448 plasmid was transformed into DH5-alpha competent bacteria by heat shock and the bacteria were incubated in  
449 3 mL of LB broth for 1 hour to induce the synthesis of the antibiotic resistance molecules and then plated on  
450 LB plates containing 100  $\mu$ g/ $\mu$ L of ampicillin. The following day, cells were screened by polymerase chain  
451 reaction (PCR) using primers to validate the correct golden gate assembly of the construct. Successfully  
452 transformed bacterial colonies were inoculated in LB broth containing 100  $\mu$ g/ $\mu$ L of ampicillin and incubated  
453 overnight at 37 °C. Cells were harvested from the overnight incubation and the plasmid was extracted using  
454 the QIAprep Spin Miniprep Kit following the manufacturer's instructions.

455 The 120 bp cassettes used for the deletion of *URA3*, *NDT80* and *SPO11* were designed to be flanking 60 bp  
456 upstream and downstream the candidate gene which harbours the cutting site for Cas9 and ordered as a unique  
457 synthetic oligo at Eurofins Genomics. The forward and reverse cassettes were mixed at equimolar ratio,  
458 heated at 95 °C for 15 minutes and then cooled down at room temperature to be ready for the transformation.  
459 Yeast samples were transformed using between 1-15  $\mu$ g of cassette, at least 200 ng of CRISPR/Cas9 plasmid  
460 and following the protocol from<sup>42</sup>. Cells were then plated on selective media containing kanamycin (400  
461  $\mu$ g/mL) and incubated at 30 °C for 3 - 7 days. Candidate transformed clones were validated by PCR using  
462 primers designed on the outside regions of the deleted genes. Positive clones were streaked for single on YPD  
463 and grown for 2 days at 30 °C to allow plasmid loss. Plasmid loss was confirmed by plating again the colonies  
464 in the selective medium and positive ones were patched on YPD and stored at -80 °C in 25% glycerol tubes.

465

#### 466 **RTG selection by *URA3*-loss assay**

467 A *URA3* cassette was introduced in one *LYS2* locus on chromosome II in *URA3* knock-out OS1364 and  
468 OS1431 strains by using the classical lithium acetate protocol. The correct insertion was validated by  
469 checking for restored prototrophy on synthetic media lacking uracil and by PCR. Positive clones were stored  
470 at -80 °C in 25% glycerol tubes. For performing the *URA3*-loss assay, cells from the frozen stocks were  
471 patched on YPD plates and incubated at 30 °C for 2 days. Cells were then streaked on plates lacking uracil

472 and incubated at 30 °C for 2 days. Single colonies were picked and sporulation was induced following the  
473 protocol described in the paragraph “Sporulation monitoring and spore viability”. Cells from the sporulation  
474 cultures were taken at 0, 6 and 14 hours after sporulation induction, washed three times with YPD and  
475 incubated in YPD for 12 hours at 30 °C without shaking. Dilutions of the YPD liquid culture were spotted  
476 onto YPD plates and an appropriate dilution was chosen for each strain and plated on 5-FOA (2% dextrose,  
477 0.675% yeast nitrogen base, 0.088% uracil drop-out, 0.005% uracil, 2 % agar, 0.1% 5 -FOA plates. The plates  
478 were incubated at 30 °C for 2 days and colonies growing on 5-FOA plates were counted at all the time points.  
479 We calculated the LOH rate at the three time points (T0, T6 and T14) as the ratio between the % of cells  
480 growing on 5-FOA and the respective percentage of cells growing on YPD, according to the following  
481 equations:

482

$$483 \text{ LOH rate}_{T0} = 100 \times (\text{CFU}_{5\text{-FOA},T0} / \text{CFU}_{\text{YPD},T0})$$

$$484 \text{ LOH rate}_{T6} = 100 \times (\text{CFU}_{5\text{-FOA},T6} / \text{CFU}_{\text{YPD},T6})$$

$$485 \text{ LOH rate}_{T14} = 100 \times (\text{CFU}_{5\text{-FOA},T14} / \text{CFU}_{\text{YPD},T14})$$

486

487 where  $\text{CFU}_{5\text{-FOA},T0}$  is the number of colony forming units on 5-FOA at T0 and  $\text{CFU}_{\text{YPD},T0}$  is the number of  
488 colony forming units on YPD at T0. These LOH rates were used to calculate: 1) the fold-increase of cells  
489 experiencing LOH by dividing the LOH rate at T6 or T14 by the LOH rate at T0 (LOH ratio); 2) the absolute  
490 difference of LOH by subtracting the LOH rate at T0 to the respective LOH rates at T6 and T14.

491

#### 492 **RTG selection by natural phenotypes**

493 Sporulation of wild-type hybrids was induced as described in “Sporulation monitoring and spore viability” for  
494 a time window compatible with RTG (14 hours). Cells were withdrawn from the sporulation medium before  
495 the appearance of MI cells to avoid plating committed meiotic cells. At the appropriate time point, cells were  
496 shifted from sporulation medium to liquid YPD. Part of the cells were incubated between 2 - 3 hours to induce  
497 RTG but not budding and separation of the mother-daughter RTG pairs, while others were incubated longer to  
498 allow complete budding and separation of candidates M-D RTG pairs. Then, the samples were plated on  
499 modified YPD media (YPD 0.5 : 1% yeast extract, 2% peptone, 0.5% dextrose. YPD 1 : 1% yeast extract, 2%  
500 peptone, 1% dextrose) and plates were incubated at 30 °C and monitored daily for colony formation and  
501 morphology variation. Mother-daughter RTG pairs were selected as single colonies displaying two sectors  
502 with different morphology, of which one resembled the wild-type phenotype whereas the other was divergent.  
503 Cells from each side of the sectors were taken with a wooden stick and streaked on their respective modified  
504 YPD to limit contamination from cells of the other sector, and incubated at 30 °C for 2 days. Then, a single  
505 colony was taken, patched on YPD and incubated at 30 °C for 2 days and finally stored in 25% glycerol tubes  
506 at -80 °C. Pictures of the sectoring colonies on the plates were taken with a stereomicroscope Discovery v.8  
507 Zeiss.

508

## 509 **CNVs detection in parental strains and RTG samples**

510 Short reads Illumina sequencings of were performed at the genomic platform of the Institute Curie. Reads  
511 were mapped to the S288C reference genome with the bwa-mem algorithm. Optical duplicates of the  
512 sequencing were removed using “samtools rmdup”. Processed BAM files were then indexed using “samtools  
513 index” and coverage was extracted using “samtools depth”. Coverage along the chromosomes was plotted  
514 using in-house R scripts in which sliding windows of non-overlapping 10 kbp were used to calculate a local  
515 average coverage, which was then normalized with the median coverage along the chromosome. Genome-  
516 wide coverage profiles were manually inspected to detect artifacts due to “smiley pattern”<sup>5</sup> or lower coverage  
517 affecting only small chromosomes. Aneuploidies and large CNVs were detected by manually inspecting the  
518  $\log_2$  coverage profiles, while shorter CNVs (< 1 Kbp) were detected by computing the median coverage  
519 across sliding windows of non-overlapping 1 Kbp. Regions showing a coverage variation with respect to the  
520 median of their respective chromosome were then matched with the previously detected CNVs.

521

## 522 **LOH detection in RTG samples**

523 To identify LOHs in the evolved RTGs, we first generated a list of reliable markers represented by all the  
524 heterozygous positions between the reference S288C strain and the two polyploid parental genomes (OS1364  
525 and OS1431). Reads mapping and post-processing of sequenced parental strains, T0 and RTG samples were  
526 performed as described in the previous paragraph “CNVs detection in parental strains and RTG  
527 samples”. Variant calling in the parental strains was performed by using Freebayes (v1.3.1-19) with the  
528 options “-p” to set the appropriate ploidy. The parental vcf files were then filtered to include only “SNP”  
529 markers with quality >20 and depth >10 using bcftools with the options “TYPE=snp, QUAL > 20, DP > 10”.  
530 Variant calling on the evolved RTG and control (T0) clones was done using Freebayes with the options “-p”  
531 to set the appropriate ploidy, “-@” to call variants at the previously identified heterozygous positions and the  
532 additional options “-m 30, -q 20 -i -X -u” for minimum depth, quality and to exclude complex variants. Vcfs  
533 were then filtered with bcftools to take only “SNP” variants. As an additional filtering step, the parental and  
534 samples vcf files were intersected using bedtools “-intersect” and variants with shared positions were  
535 extracted from the vcf of the RTG evolved samples. Next, we used an in-house R script to compare the  
536 frequencies of the alternative and reference alleles of each marker in the evolved samples and in the parental  
537 ones. We identified putative recombined regions as the ones showing an allele frequency shift in the markers,  
538 independently of its direction. Heterozygous markers present in the parental strain but not in the RTG samples  
539 were considered to have reached a fixed reference homozygous genotype if the position was covered during  
540 sequencing. Moreover, the allele of the marker tagged as being in an LOH region was compared with the  
541 known allele of the marker present in the ancestral strain and those not matching the expected allele were  
542 filtered out. Given the complexity of polyploids analysis, we decided to use a stringent threshold and we  
543 annotated regions as LOH only if they contained at least 9 consecutive recombined markers regardless of the  
544 directionality of the allele that is gain or lost due to recombination. In this way, we avoided calling false  
545 positive LOHs at the cost of decreasing our resolution. Among those LOHs, the ones overlapping for >80% of

546 their length among  $\geq 70\%$  of the samples considering each datasets separately (wild-type RTG, *LYS2/URA3*  
547 selected RTG and *ndt80Δ* RTG) were filtered out. Additionally, LOH overlapping for  $\geq 90\%$  of their length  
548 with the ones found in the T0 samples were also excluded. LOHs spanning the *LYS2/URA3* locus on  
549 chromosome II were not excluded but that chromosome was not counted for calculating the percentage of  
550 markers lying in LOH regions. Moreover, LOHs already present in the parental samples engineered with the  
551 *LYS2/URA3* system, or in which *NDT80* was deleted, were removed from the respective derived samples.  
552 LOHs in subtelomeric regions were excluded due to the unreliability of mapping in these highly repetitive  
553 regions. Finally, the list of annotated CNVs in core parts of the genome of the parental strains was used to  
554 filter the LOH detected. The plots of the LOH distribution were done using an in-house R script implemented  
555 with ggplot2 (v3.6.1) that takes into account the genotype shift of each marker in the LOH blocks.

556

### 557 **Inferring the parental haplotypes from the mother-daughter RTG pairs**

558 One M-D RTG pair derived from OS1364 was used as a proof of concept to phase a region on the left arm of  
559 chromosome IX where recombination likely resulted from a cross-over between two homologs. The genotype  
560 of each heterozygous marker was inferred based on the allele frequency (AF) shift in the M-D pair. For  
561 example, when we detected an AF shift toward the alternative allele in a marker, that is, the RTG sample has  
562 gained one alternative allele, the genotype of the allele was assigned as the reference for that marker. We  
563 followed the same approach when we detected an AF shift toward the reference allele and assigned in this  
564 case the “alternative” genotype. Then, the information of these recombined haplotypes was used to infer the  
565 third haplotype based on the allele dosage, which is the number of “Ref” or “Alt” copies estimated for each  
566 heterozygous marker. For instance, if the initial genotype was “Ref/Alt/Alt” and the AF shift detected was  
567 toward the reference allele, the third unknown haplotype harboured an “Alt” allele and the two recombining  
568 haplotypes had respectively a “Reference” and “Alternative” allele. The information of the recombined  
569 haplotypes were validated on a second RTG M-D pair having a recombination event spanning the same  
570 region.

571

### 572 **Microplate cultivations**

573 The osmotic stress and ethanol tolerance were assessed with microcultures in media containing 25% (w/v)  
574 sorbitol and 8% (v/v) ethanol, respectively. The microcultures were carried out in 100-well honeycomb  
575 microtiter plates at 25 °C (with continuous shaking), and their growth dynamics were monitored with a  
576 Bioscreen C MBR incubator and plate reader (Oy Growth Curves Ab, Finland). The wells of the microtiter  
577 plates were filled with 300  $\mu$ L of YPM medium (1% yeast extract, 2% peptone, 1% maltose) supplemented  
578 with sorbitol (25%) and ethanol (8% v/v). Control cultivations in media without sorbitol or ethanol were also  
579 carried out. Precultures of the strains were started in 20 mL YPM medium and incubated at 25 °C with  
580 shaking at 120 rpm overnight. We measured the optical density at 600 nm, and pre-cultures were diluted to a  
581 final OD<sub>600</sub> value of 3. The microcultures were started by inoculating the microtiter plates with 10  $\mu$ L of cell  
582 suspension per well (for an initial OD<sub>600</sub> value of 0.1) and placing the plates in the Bioscreen C MBR. The

583 optical density of the microcultures at 600 nm was automatically read every 30 min. Four replicates were  
584 performed for each strain in each medium. Growth curves for the microcultures were modelled based on the  
585 OD<sub>600</sub> values over time using the ‘GrowthCurver’-package for R<sup>44</sup>.

586

#### 587 **Flask-scale very high gravity wort fermentations**

588 50 mL-scale fermentations were carried out in 100 mL Schott bottles capped with glycerol-filled airlocks.  
589 Yeast strains were grown overnight in 25 mL YPM medium at 25 °C. The pre-cultured yeast was then  
590 inoculated into 50 mL of 32 °P wort made from malt extract (Senson Oy, Finland) at a rate of 7.5 g fresh yeast  
591 L<sup>-1</sup>. Fermentations were carried out in duplicate at 20 °C for 13 days. Fermentations were monitored by mass  
592 lost as CO<sub>2</sub>. The alcohol content of the final beer was measured with an Anton Paar density meter DMA 5000  
593 M with Alcoalyzer beer ME and pH ME modules (Anton Paar GmbH, Austria).

594

#### 595 **2-L scale high-gravity wort fermentations**

596 Strains were characterized in fermentations performed in a 20 °P high gravity wort at 20 °C. Cultures were  
597 propagated essentially as described previously<sup>45</sup>, with the use of a “generation 0” fermentation prior to the  
598 actual experimental fermentations. The experimental fermentations were carried out in triplicate, in 3-liter  
599 cylindroconical stainless steel fermenting vessels, containing 2 liters of wort medium. The 20 °P wort (98 g of  
600 maltose, 34.7 g of maltotriose, 24 g of glucose, and 6.1 g of fructose per liter) was produced at the VTT Pilot  
601 Brewery from barley malt and malt extract (Senson Oy, Finland). Fermentations were inoculated at a rate of 5  
602 g fresh yeast L<sup>-1</sup> (corresponding to approximately  $15 \times 10^6$  viable cells · mL<sup>-1</sup>). The wort was oxygenated to  
603 10 mg · L<sup>-1</sup> prior to pitching (oxygen indicator model 26073 and sensor 21158; Orbisphere Laboratories,  
604 Switzerland). The fermentations were carried out at 20 °C until the alcohol level stabilized, or for a maximum  
605 of 15 days. Wort samples were drawn regularly from the fermentation vessels aseptically and placed directly  
606 on ice, after which the yeast was separated from the fermenting wort by centrifugation (9,000 × g, 10 min, 1  
607 °C). Samples for yeast-derived flavour compound analysis were drawn from the beer when fermentations  
608 were ended. Cells viability was measured by propidium iodide staining of the cells that were collected at the  
609 end of the fermentations using a Nucleocounter ® YC-100<sup>TM</sup> (ChemoMetec, Denmark).

610

#### 611 **Chemical analysis of fermentable sugars**

612 The concentrations of fermentable sugars (maltose and maltotriose) were measured by HPLC using a Waters  
613 2695 separation module and Waters system interphase module liquid chromatograph coupled with a Waters  
614 2414 differential refractometer (Waters Co., Milford, MA, USA). A Rezex RFQ-Fast Acid H<sup>+</sup> (8%) LC  
615 column (100 × 7.8 mm; Phenomenex, USA) was equilibrated with 5 mM H<sub>2</sub>SO<sub>4</sub> (Titrisol, Merck, Germany)  
616 in water at 80 °C, and samples were eluted with 5 mM H<sub>2</sub>SO<sub>4</sub> in water at a 0.8 mL · min<sup>-1</sup> flow rate. The  
617 alcohol level (% vol/vol) of samples was determined from the centrifuged and degassed fermentation samples  
618 using an Anton Paar density meter DMA 5000 M with Alcoalyzer beer ME and pH ME modules (Anton Paar  
619 GmbH, Austria).

620

## 621 **Chemical analysis of aroma compounds in fermented beers**

622 Yeast-derived higher alcohols and esters were determined by headspace gas chromatography with flame  
623 ionization detector (HS-GC-FID) analysis. Four-milliliter samples were filtered (0.45  $\mu\text{m}$  pore size) and  
624 incubated at 60  $^{\circ}\text{C}$  for 30 min, and then 1 ml of gas phase was injected (split mode, 225  $^{\circ}\text{C}$ , split flow of 30  
625  $\text{mL} \cdot \text{min}^{-1}$ ) into a gas chromatograph equipped with an FID detector and headspace autosampler (Agilent  
626 7890 series; Palo Alto, CA, USA). Analytes were separated on a HP-5 capillary column (50 m by 320  $\mu\text{m}$  by  
627 1.05  $\mu\text{m}$  column; Agilent, USA). The carrier gas was helium (constant flow of 1.4  $\text{mL} \cdot \text{min}^{-1}$ ). The  
628 temperature program was 50  $^{\circ}\text{C}$  for 3 min, 10  $^{\circ}\text{C} \cdot \text{min}^{-1}$  to 100  $^{\circ}\text{C}$ , 5  $^{\circ}\text{C} \cdot \text{min}^{-1}$  to 140  $^{\circ}\text{C}$ , 15  $^{\circ}\text{C} \cdot \text{min}^{-1}$  to  
629 260  $^{\circ}\text{C}$ , and then isothermal for 1 min. Compounds were identified by comparison with authentic standards  
630 and were quantified using standard curves. 1-Butanol was used as an internal standard.

631

## 632 **References**

633

- 634 1. Diamond, J. Evolution, consequences and future of plant and animal domestication. *Nature* **418**, 700–  
635 707 (2002).
- 636 2. Hickey, J. M., Chiurugwi, T., Mackay, I. & Powell, W. Genomic prediction unifies animal and plant  
637 breeding programs to form platforms for biological discovery. *Nat. Genet.* **49**, 1297–1303 (2017).
- 638 3. Sander, J. D. & Joung, J. K. CRISPR-Cas systems for editing, regulating and targeting genomes. *Nat.*  
639 *Biotechnol.* **32**, 347–355 (2014).
- 640 4. Duan, S.-F. *et al.* The origin and adaptive evolution of domesticated populations of yeast from Far East  
641 Asia. *Nat. Commun.* **9**, 2690 (2018).
- 642 5. Gallone, B. *et al.* Domestication and Divergence of *Saccharomyces cerevisiae* Beer Yeasts. *Cell* **166**,  
643 1397–1410.e16 (2016).
- 644 6. Steensels, J., Gallone, B., Voordeckers, K. & Verstrepen, K. J. Domestication of Industrial Microbes.  
645 *Curr. Biol.* **29**, R381–R393 (2019).
- 646 7. Gallone, B. *et al.* Interspecific hybridization facilitates niche adaptation in beer yeast. *Nat. Ecol. Evol.*  
647 **3**, 1562–1575 (2019).
- 648 8. Krogerus, K., Magalhães, F., Vidgren, V. & Gibson, B. Novel brewing yeast hybrids: creation and  
649 application. *Appl. Microbiol. Biotechnol.* **101**, 65–78 (2017).
- 650 9. Gibson, B. *et al.* New yeasts—new brews: modern approaches to brewing yeast design and  
651 development. *FEMS Yeast Res.* **17**, (2017).
- 652 10. García-Ríos, E. *et al.* Improving the Cryotolerance of Wine Yeast by Interspecific Hybridization in the  
653 Genus *Saccharomyces*. *Front. Microbiol.* **9**, 3232 (2019).
- 654 11. De Chiara, M. *et al.* Domestication reprogrammed the budding yeast life cycle. (Evolutionary Biology,  
655 2020).
- 656 12. Ono, J., Greig, D. & Boynton, P. J. Defining and Disrupting Species Boundaries in *Saccharomyces*.  
657 *Annu. Rev. Microbiol.* **74**, 477–495 (2020).
- 658 13. Peter, J. *et al.* Genome evolution across 1,011 *Saccharomyces cerevisiae* isolates. *Nature* **556**, 339–344  
659 (2018).

- 660 14. Bigey, F. *et al.* Evidence for Two Main Domestication Trajectories in *Saccharomyces cerevisiae*  
661 Linked to Distinct Bread-Making Processes. *Curr. Biol.* **31**, 722–732.e5 (2021).
- 662 15. Loidl, J. Meiotic chromosome pairing in triploid and tetraploid *Saccharomyces cerevisiae*. *Genetics*  
663 **139**, 1511–1520 (1995).
- 664 16. Steensels, J. *et al.* Improving industrial yeast strains: Exploiting natural and artificial diversity. *FEMS*  
665 *Microbiol. Rev.* **38**, 947–995 (2014).
- 666 17. Mozzachiodi, S. *et al.* Aborting meiosis allows recombination in sterile diploid hybrids. *Nature*  
667 *Communications*, *In press*.
- 668 18. Laureau, R. *et al.* Extensive Recombination of a Yeast Diploid Hybrid through Meiotic Reversion.  
669 *PLOS Genet.* **12**, e1005781 (2016).
- 670 19. Friedlander, G. *et al.* [No title found]. *Genome Biol.* **7**, R20 (2006).
- 671 20. Dayani, Y., Simchen, G. & Lichten, M. Meiotic Recombination Intermediates Are Resolved with  
672 Minimal Crossover Formation during Return-to-Growth, an Analogue of the Mitotic Cell Cycle. *PLoS*  
673 *Genet.* **7**, e1002083 (2011).
- 674 21. Yue, J. X. *et al.* Contrasting evolutionary genome dynamics between domesticated and wild yeasts.  
675 *Nat. Genet.* **49**, 913–924 (2017).
- 676 22. Marsit, S., Leducq, J., Durand, É. & Marchant, A. Evolutionary biology through the lens of budding  
677 yeast comparative genomics. *Nature reviews Genetics*. doi:10.1038/nrg.2017.49
- 678 23. Liu, G. *et al.* Gene Essentiality Is a Quantitative Property Linked to Cellular Evolvability. *Cell* **163**,  
679 1388–1399 (2015).
- 680 24. Charles, J. S., Hamilton, M. L. & Petes, T. D. Meiotic Chromosome Segregation in Triploid Strains of  
681 *Saccharomyces cerevisiae*. *Genetics* **186**, 537–550 (2010).
- 682 25. D’Angiolo, M. *et al.* A yeast living ancestor reveals the origin of genomic introgressions. *Nature* **587**,  
683 420–425 (2020).
- 684 26. Granek, J. A. & Magwene, P. M. Environmental and Genetic Determinants of Colony Morphology in  
685 Yeast. *PLoS Genet.* **6**, e1000823 (2010).
- 686 27. Voordeckers, K. *et al.* Identification of a complex genetic network underlying *Saccharomyces*  
687 *cerevisiae* colony morphology. *Mol. Microbiol.* **86**, 225–239 (2012).
- 688 28. Mans, R., Daran, J.-M. G. & Pronk, J. T. Under pressure: evolutionary engineering of yeast strains for  
689 improved performance in fuels and chemicals production. *Curr. Opin. Biotechnol.* **50**, 47–56 (2018).
- 690 29. Perli, T., Moonen, D. P. I., van den Broek, M., Pronk, J. T. & Daran, J.-M. Adaptive Laboratory  
691 Evolution and Reverse Engineering of Single-Vitamin Prototrophies in *Saccharomyces cerevisiae*.  
692 *Appl. Environ. Microbiol.* **86**, e00388-20, /aem/86/12/AEM.00388-20.atom (2020).
- 693 30. Gerstein, A. C., Chun, H.-J. E., Grant, A. & Otto, S. P. Genomic Convergence toward Diploidy in  
694 *Saccharomyces cerevisiae*. *PLoS Genet.* **2**, e145 (2006).
- 695 31. Caspeta, L. *et al.* Altered sterol composition renders yeast thermotolerant. *Science.* **346**, 75–78 (2014).
- 696 32. Caspeta, L. & Nielsen, J. Thermotolerant Yeast Strains Adapted by Laboratory Evolution Show Trade-  
697 Off at Ancestral Temperatures and Preadaptation to Other Stresses. *MBio* **6**, e00431-15 (2015).
- 698 33. Caspeta, L., Chen, Y. & Nielsen, J. Thermotolerant yeasts selected by adaptive evolution express heat  
699 stress response at 30 °C. *Sci. Rep.* **6**, 27003 (2016).
- 700 34. Kuyper, M. *et al.* Evolutionary engineering of mixed-sugar utilization by a xylose-fermenting strain.  
701 *FEMS Yeast Res.* **5**, 925–934 (2005).

- 702 35. Linderholm, A. L., Findleton, C. L., Kumar, G., Hong, Y. & Bisson, L. F. Identification of Genes  
703 Affecting Hydrogen Sulfide Formation in *Saccharomyces cerevisiae*. *Appl. Environ. Microbiol.* **74**,  
704 1418–1427 (2008).
- 705 36. Ruusuvaori, P. *et al.* Quantitative analysis of colony morphology in yeast. *Biotechniques* **56**, (2014).
- 706 37. Serero, A. *et al.* Recombination in a sterile polyploid hybrid yeast upon meiotic Return-To-Growth.  
707 *Microbiol. Res.* **250**, 126789 (2021).
- 708 38. Abou Saada, O., Tsouris, A., Eberlein, C., Friedrich, A. & Schacherer, J. nPhase: an accurate and  
709 contiguous phasing method for polyploids. *Genome Biol* **22**, 126 (2021).
- 710 39. McLaren, W. *et al.* The Ensembl Variant Effect Predictor. *Genome Biol.* **17**, 122 (2016).
- 711 40. Yue, J.-X. & Liti, G. Long-read sequencing data analysis for yeasts. *Nat. Protoc.* **13**, 1213–1231  
712 (2018).
- 713 41. Kurtz, S. *et al.* Versatile and open software for comparing large genomes. *Genome Biol.* **5**, R12 (2004).
- 714 42. Vries, A. R. G. De, Groot, P. A. De, Broek, M. Van Den & Daran, J. M. G. CRISPR - Cas9 mediated  
715 gene deletions in lager yeast *Saccharomyces pastorianus*. *Microb. Cell Fact.* 1–18 (2017).
- 716 43. Okonechnikov, K., Golosova, O. & Fursov, M. Unipro UGENE: a unified bioinformatics toolkit.  
717 *Bioinformatics* **28**, 1166–1167 (2012).
- 718 44. Sprouffske, K. & Wagner, A. Growthcurver: an R package for obtaining interpretable metrics from  
719 microbial growth curves. *BMC Bioinformatics* **17**, 172 (2016).
- 720 45. Krogerus, K. *et al.* Ploidy influences the functional attributes of de novo lager yeast hybrids.  
721 *Appl. Microbiol. Biotechnol.* **100**, 7203–7222 (2016).

722

723

724

## 725 **Acknowledgements**

726 This work was supported by Agence Nationale de la Recherche (ANR-13-BSV6-0006-01, ANR-18-CE12-  
727 0004, ANR-15-IDEX-01), Fondation pour la Recherche Médicale (EQU202003010413), UCA AAP Start-up  
728 Deep tech, CEFIPRA, convention CIFRE 2016/0582 between Meiogenix and ANRT. We thank D’Angiolo  
729 M. and Adekunle D. for their critical reading of the manuscript.

730

## 731 **Author contributions**

732 S.M., A.N., G.L., conceived the project, S.M., K.K., A.N., B.G., G.L. designed the experiments, S.M., K.K.  
733 performed the experiments and analyzed the data, S.M. and G.L. wrote the paper with input from K.K., B.G.  
734 and A.N.

735

## 736 **Competing interests**

737 A.N. and G.L. have a patent application on “Yeast strains improvement method” using return-to-growth  
738 (US20150307868A1).

739

740



741 **Data and materials availability**

742 The phenotype data are available within the supplementary tables. The short reads have been deposited on the

743 SRA archive <https://www.ncbi.nlm.nih.gov/sra> with project number PRJNA770168.
